# Supplementary material for: Effects of Sequential Enzymolysis and Glycosylation on the Structural Properties and Antioxidant Activity of Soybean Protein Isolate
Source: MDPI journal article supplement (doi:10.3390/antiox12020430), 2023-02-09
Supplement: s1 [file s1]

# Effects of Sequential Enzymolysis and Glycosylation on the Structural Properties and Antioxidant Activity of Soybean Protein Isolate

Qing Zhang \*, Lin Li, Lan Chen, Shuxiang Liu, Qiang Cui, and Wen Qin \*

Key Laboratory of Agricultural Product Processing and Nutrition Health of Ministry of  
Agriculture and Rural Affairs (Co-Construction by Ministry and Province), College of Food  
Science, Sichuan Agricultural University, No. 46, Xinkang Road, Ya'an 625014, China

\*Address correspondence to Qing Zhang, e-mail: zhangqing@sicau.edu.cn; Wen Qin, e-mail:  
qinwen@sicau.edu.cn

**Table S1.** Relative MW distribution parameters of F30, F30-10, and F10 <sup>a</sup>.

| Sample | M <sub>p</sub> (Da) |        |        |        | Relative content (%) |        |        |        | M <sub>w</sub> /M <sub>n</sub> (Peak 2) |
|--------|---------------------|--------|--------|--------|----------------------|--------|--------|--------|-----------------------------------------|
|        | Peak 1              | Peak 2 | Peak 3 | Peak 4 | Peak 1               | Peak 2 | Peak 3 | Peak 4 |                                         |
| F30    | 8044                | 2640   | 796    | 402    | 5.95                 | 15.05  | 19.42  | 59.58  | 1.18                                    |
| F30-10 | ND                  | 2570   | 807    | 392    | ND                   | 8.83   | 18.53  | 72.64  | 1.14                                    |
| F10    | ND                  | 1298   | 825    | 404    | ND                   | 3.55   | 19.05  | 77.41  | 1.11                                    |

<sup>a</sup> ND represents no detected. MW, molecular weight; M<sub>p</sub>, peak molecular weight; M<sub>w</sub>, weight-average molecular weight; M<sub>n</sub>, number-average molecular weight.
